# Supplementary material for: Trait-Environment Relationships Reveal the Success of Alien Plants Invasiveness in an Urbanized Landscape
Source: MDPI journal article supplement (doi:10.3390/plants10081519), 2021-07-26
Supplement: s1 [file s1]

## Supplementary Material

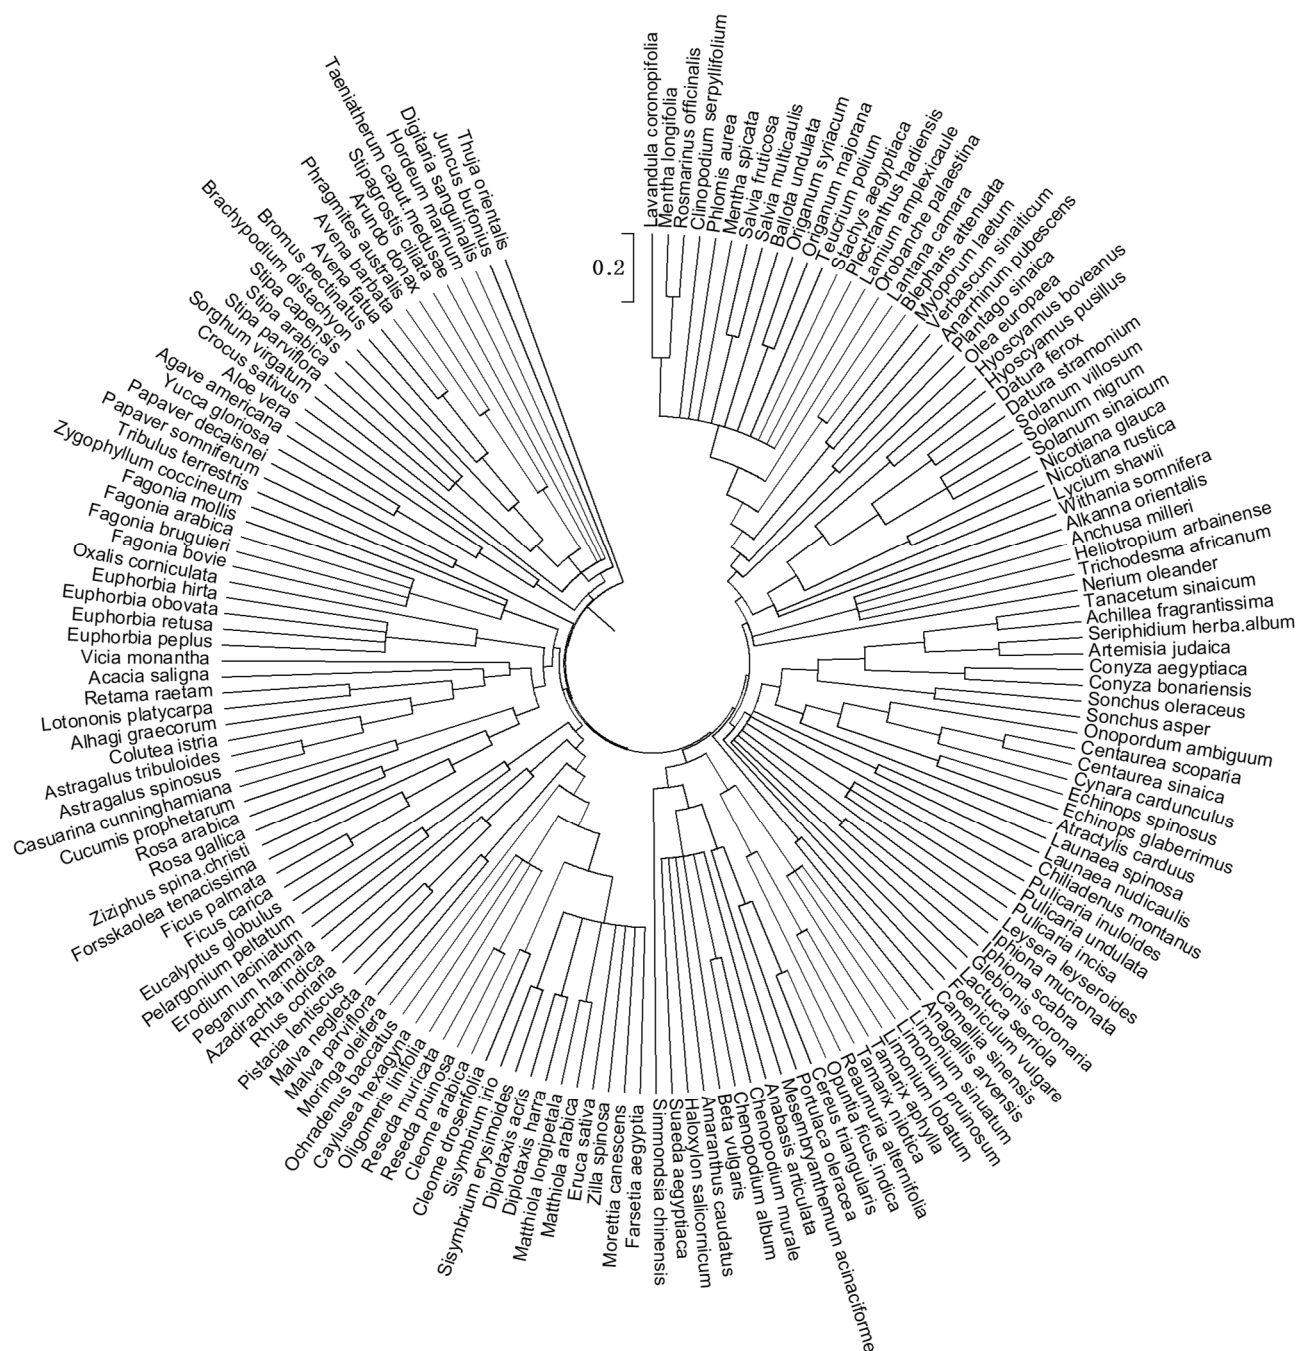

**Figure S1.** Rooted ultrametric phylogenetic tree including the pool of 130 native species and 33 alien species collected from 83 pairs of invaded and non-invaded plots in Saint Katherine Protectorate. This tree was created by El-Barougy, Reham.F using PhyML-3.0 software ,version 3.0 [110].

**Table S1.** shows the description of all the studied variables.

| Variable Category       | Variables                    | biotic / abiotic | Value                                                       | Unit/Description                             | Source       |
|-------------------------|------------------------------|------------------|-------------------------------------------------------------|----------------------------------------------|--------------|
| Plant Species Traits    | Height                       | biotic           | metric                                                      | cm                                           | Field survey |
|                         | SLA                          | biotic           | metric                                                      | cm <sup>2</sup> /gm                          | Lab analysis |
|                         | Number of leaves             | biotic           | metric                                                      | integer number                               | Field survey |
|                         | Canopy Diameter              | biotic           | metric                                                      | cm                                           | Field Survey |
|                         | Number of flowers and fruits | biotic           | metric                                                      | integer number                               | Field survey |
|                         | Above-ground-bio-mass        | biotic           | metric                                                      | gm                                           | Lab analysis |
| Edaphic variables       | Organic matter               | abiotic          | metric                                                      | percentage                                   | Lab analysis |
|                         | Nitrogen                     | abiotic          | metric                                                      | mg/L                                         | Lab analysis |
|                         | Soil Depth                   | abiotic          | Factor (2 levels of soil depth:0-50 and > 50) 1-            | Zero -low depth, high depth                  |              |
|                         | Soil moisture                | abiotic          | metric                                                      | percentage                                   | Lab analysis |
| Anthropogenic pressures | Grazing                      | biotic           | 1-3 values for three different levels of pressure intensity | 1- high level, 2- medium level, 3-high level | Field survey |
|                         | Tourism                      | biotic           |                                                             |                                              | Field survey |
|                         | Urban cover                  | biotic           |                                                             |                                              | Field survey |
|                         | Over-collection              | biotic           |                                                             |                                              | Field survey |

**Table S2.** shows the description of all abbreviations that were stated in the studied work.

| Acrynom | Description                                        |
|---------|----------------------------------------------------|
| SKP     | <i>Saint Katherine Protectorate</i>                |
| NMPD    | <i>Native Mean Phylogenetic Distance</i>           |
| NMFD    | <i>Native Mean Functional Distance</i>             |
| AMPD    | <i>Alien Mean Phylogenetic Distance</i>            |
| AMFD    | <i>Alien Mean Functional Distance</i>              |
| ANMPD   | <i>Alien and Native Mean Phylogenetic Distance</i> |
| ANMFD   | <i>Alien and Native Mean Functional Distance</i>   |
| SLA     | <i>Specific Leaf area (cm<sup>2</sup>/gm)</i>      |
